1 TITLE: Elucidating dispersal ecology of reclusive species through genetic analyses of parentage  
2 and relatedness: the island night lizard (*Xantusia riversiana*) as a case study.

3

4 Stephen E. Rice<sup>1</sup> and Rulon W. Clark<sup>1</sup>

5 1. San Diego State University, Dept of Biology, 5500 Campanile Drive, San Diego, California,  
6 92182

7

8 CORRESPONDING AUTHOR:

9 Stephen E. Rice, San Diego State University, Department of Biology, 5500 Campanile Drive,  
10 San Diego, California, 92182-4614. Phone: (619) 594-2435 Fax: (619) 594-5676. Email:  
11 srice001@ucr.edu

12

13 ACKNOWLEDGEMENTS

14 Support for this research came from United States Department of Defense (Award Number  
15 W9126G-12-2-0060) and the Southern California Research and Learning Center (Award  
16 Number S18309). We would like to thank the National Park Service for access to SBI, SCI  
17 Naval Base for access to SCI and our field assistants. In addition we would like to thank Drs. A.  
18 Bohonak (SDSU), H. Regan (UCR), K. Anderson (UCR), and J. Gatesy (UCR) for comments  
19 received during manuscript preparation.

20

21 **ABSTRACT**

22 Characterizing dispersal and movement patterns are vital to understanding the  
23 evolutionary ecology of species. For many reclusive species, such as reptiles, the observation of  
24 direct dispersal may be difficult or intractable. However, dispersal distances and patterns may be

25 characterized through indirect genetic methods. We used genetic and capture data from the island  
26 night lizard (*Xantusia riversiana*) to estimate natal dispersal distances through indirect genetic  
27 methods, characterize movement and space use patterns, and compare these distances to previous  
28 estimates made from more traditional ecological approaches. We found that indirect estimates of  
29 natal dispersal were greater than previous field-based estimates of individual displacement of 3-5  
30 m. Parent-offspring differences had a mean of approximately 14 m on Santa Barbara Island  
31 (SBI) and 41 m on San Clemente Island (SCI) whereas Wright's  $\sigma$  was estimated at 16 m on SBI  
32 and 20 m for SCI. Spatial autocorrelation with correlograms of Moran's I revealed large  
33 differences in the scale of autocorrelation between islands (SBI=375 m, SCI=1,813 m).  
34 Interpretation of these distances as average per generation distance of gene flow was incongruent  
35 with parentage analyses and  $\sigma$ . We also used variograms to evaluate the range of spatial  
36 autocorrelation among two inter-individual genetic differences. The range of spatial  
37 autocorrelation again identified different scales on the two islands (102 - 169 m on SBI and 955 -  
38 1,424 m on SCI). No evidence of sex-biased dispersal was found on either island. However, a  
39 permutation logistic regression revealed that related individuals >0.8 years old were more likely  
40 to be captured together on both islands. Overall, our findings suggest that field-based estimates  
41 of individual displacement within this species may underestimate genetic dispersal. We suggest  
42 indirect inferences of natal dispersal distances should focus on parentage analyses and Wright's  
43  $\sigma$  for parameter estimation of individual movement, whereas the ranges identified by spatial  
44 autocorrelation and variograms are likely to be relevant at the metapopulation or patch scales.  
45 Furthermore, characterization of capture patterns and relatedness revealed kin-affiliative  
46 behavior in *X. riversiana*, which may be indicative of delayed dispersal and cryptic sociality.  
47 These results highlight the power of parentage- and relatedness-based analyses for characterizing

48 aspects of the movement ecology of reclusive species that may be difficult to observe directly.  
49 These data can then be leveraged to support future conservation and population modeling efforts  
50 and assess extinction risks and management strategies.

51

## 52 **INTRODUCTION**

53         The dispersal and movement of organisms is a fundamental process in population  
54 biology, yet may be difficult to characterize even in abundant species. Dispersal studies provide  
55 insight into the evolutionary ecology of focal species and inform conservation planning and  
56 management (e.g. Bowler & Benton 2005; Dussex et al. 2016; Hawkes 2009). Dispersal, defined  
57 here as the movement of individuals away from their natal sites, may be quantified directly  
58 through long-term capture-mark-recapture (CMR) studies and spatial monitoring, or indirectly  
59 through genetic inference methods.

60         Both approaches to characterizing dispersal have limitations. Direct observations of  
61 dispersal are labor intensive and time consuming, resulting in reduced sample sizes that may  
62 underestimate typical dispersal rates and distances (e.g. Dussex et al. 2016), whereas genetic  
63 inference may be complicated through modeling assumptions and challenges in study design and  
64 sample collection (Broquet & Petit 2009). While few studies use both direct and indirect  
65 inference methods, the proliferation of genetic methods has led to a variety of analytical  
66 approaches for detecting dispersed individuals (Manel et al. 2005), categorize age and sex biases  
67 in dispersal patterns, and characterize dispersal distances (Broquet & Petit 2009; Goudet et al.  
68 2002). The processes and potential confounds of these methods are important to understand, as  
69 incorporating unrealistic assumptions or parameters within spatial models of dispersal may yield  
70 inaccurate results and directly impact management actions and efficacy (Bowler & Benton 2005;  
71 Hawkes 2009). However, for reclusive species the characterization of dispersal from field data

72 may be especially problematic due to low probabilities of recapture (e.g. Pimm et al. 2015); thus  
73 indirect methods present a compelling tool for characterizing dispersal patterns and distances.

74 Genetic methods are an increasingly common tool for elucidating species dispersal  
75 ecology. Recently, Moore et al (2014) used parentage analyses with pairwise distances between  
76 dyad members to characterize condition-dependent dispersal patterns in American black bears.  
77 Dussex et al (2016) found that assignment methods were generally inconsistent with CMR and  
78 parentage analyses inferences. Furthermore, they found that parentage analyses were the most  
79 powerful approach at fine scales for elucidating dispersal ecology of the greater white-toothed  
80 shrew. In addition to understanding dispersal, managers often need to determine the spatial  
81 extent over which landscape influences a focal species (Jackson & Fahrig 2014). Jackson and  
82 Fahrig (2014) found that the scale at which landscape structure affects species varies with the  
83 population outcome measured. The simulation study conducted by Jackson and Fahrig (2014)  
84 suggested that the scale of landscape structure for population persistence should be a lower  
85 bound for conservation as the scale needed for supporting genetic diversity is much larger. Taken  
86 together, statistical methods that help characterize the dispersal of species and the scale at which  
87 landscape affects genetic structure can provide vital information in the context of conservation.

88 The island night lizard (*Xantusia riversiana*) was recently delisted from the Endangered  
89 Species Act and provides a unique opportunity to evaluate the utility of indirect methods to  
90 elucidate dispersal ecology. This species has been well studied, has few documented predators,  
91 and exists in discrete insular populations with high regional abundances of 3,200 individuals/ha  
92 in prime habitat. Even with long-term study, direct observations of individual movement suggest  
93 very small individual displacement distances of 3 to 6 m over multiple years (Fellers & Drost

94 1991; Mautz 1993). The dearth of information on island night lizard dispersal ecology is a direct  
95 obstacle to modelling metapopulation dynamics and potential threats due to climatic change.

96 We applied genetic inference methods to characterize dispersal ecology and infer natal  
97 dispersal distances in *X. r. reticulata*. We used genetic and capture data from our landscape  
98 genetics analysis (Rice & Clark 2016) to characterize dispersal ecology and space use on two of  
99 the three California Channel Islands this species is known to occupy. The goal of this study was  
100 to leverage existing data to assess different techniques for estimating dispersal from genetic data  
101 and compare these patterns to values derived from ecological studies.

102

## 103 **METHODS**

### 104 *Study System and Data*

105 Island night lizards are endemic to three California Channel Islands, two of which were  
106 evaluated by Rice and Clark (2016): Santa Barbara Island (SBI) and San Clemente Island (SCI).  
107 In brief, we captured 917 island night lizards across both islands utilizing a clustered sampling  
108 approach. Individuals were genotyped at 23 microsatellite loci (Rice et al 2016) and first-order  
109 relatives, defined as parent-offspring and full siblings, were identified using a consensus  
110 approach between three methods: COLONY vers 2.0.5.9 (Jones & Wang 2010), CERVUS vers 3.07  
111 (Kalinowski et al 2007), and the DyadML estimator (Milligan 2003) as calculated in COANCESTRY  
112 vers 1.0.1.5 (Wang 2011). The current study draws on the capture data, individual genetic  
113 profiles, relatedness and relationship analyses of Rice and Clark (2016).

### 114 *Statistical Approaches*

115 We used 4 approaches to quantify dispersal distances in the island night lizard: pairwise  
116 distances between inferred relationships in Rice and Clark (2016), estimation of Wright's gene-  
117 dispersal distance (Wright 1946), correlogram of Moran's I (reviewed in Hardy & Vekemans

118 1999), and range estimates from variograms (reviewed in Wagner et al. 2005). We characterized  
119 sex-biases in dispersal using the approach of Goudet et al. (2002). We evaluated predictors of co-  
120 capture among individuals with a permutation based logistic regression on distance matrices  
121 (LRDM, Prunier et al. 2015). Statistical analyses were carried out in R (R Core Team 2016)  
122 using the packages *adegenet* (Jombart 2008), *hierfstat* (Goudet & Jombart 2015), *coin* (Hothorn  
123 et al. 2006), *phylin* (Tarroso et al. 2015), and *fmsb* (Nakazawa 2015). We estimated Wright's  
124 gene dispersal distance,  $\sigma$ , and Moran's I using the program SPAGEDI vers 1.5 (Hardy &  
125 Vekemans 2002).

### 126 *Distances Between First-Order Relatives*

127 The pairwise distances between parents and offspring have been demonstrated to be a  
128 powerful tool in the characterization of dispersal ecology (e.g. Dussex et al. 2016; Moore et al.  
129 2014). We utilized the data of Rice and Clark (2016) to characterize distances between inferred  
130 relationship classes. First-order relatives consisted of individuals identified through the  
131 consensus method in Rice and Clark (2016) wherein dyads were considered first-order relatives  
132 when the inferred relationship was parent-offspring, full sibling, or the relatedness coefficient,  
133 DyadML, was greater than 0.35. Relationship classes of parent-offspring, full sibling, and half  
134 sibling were inferred by COLONY. Unrelated samples were all relationships not detected by  
135 COLONY.

136 We used an approximate general independent test of distances between ordered  
137 relationship groups in the package *coin* to test whether pairwise geographic distances differed  
138 between relationship groups within and between islands. To correct for the presence of neonates  
139 captured in close proximity to adults, we present analyses based on the full data sets and data sets

140 consisting only of individuals greater than 40 mm snout-to-vent length (SVL) which equates to  
141 approximately 0.8 years old (Fellers & Drost 1991).

#### 142 *Wright's $\sigma$*

143 Wright (1946) described an isolation by distance model in which the genetic  
144 neighborhood is a 2-dimensional area in which most mating events occur. This model can be  
145 used to estimate  $\sigma$  from a regression of the inter-individual genetic distance, Rousset's  $a$   
146 (Rousset 2000), on the logarithm of the inter-individual distance (Hardy et al. 2006; Rousset  
147 2000). We assumed drift-migration equilibrium and estimated  $\sigma$ , interpreted as mean natal  
148 dispersal distance, for each island across 3 distance classes and 5 density estimates (Table 1).  
149 Density estimates were based on the average effective population size per sample site as  
150 estimated by the linkage-disequilibrium method (Hill 1981) and confidence intervals from the  
151 program NEESTIMATOR vers 2.01 (Do et al. 2014). Additional estimates of density were derived  
152 from the census population size over the entire area of each island and the prime-habitat area  
153 listed in the United States Fish and Wildlife Service post-delisting monitoring plan (USFWS  
154 2014).

#### 155 *Moran's $I$*

156 Moran's  $I$  is a common measure of spatial autocorrelation of individual allele frequencies  
157 (Hardy & Vekemans 1999). Moran's  $I$  was calculated for each pairwise distance bin, set at  
158 increments of 150 m for SBI and 500 m for SCI, and significance was tested with 1000  
159 permutations. The increments for distance bins were assigned based on the smallest distance at  
160 which all bins had observations. For each island, we produced a correlogram of Moran's  $I$  at  
161 each distance class. The distance at which the value of Moran's  $I$  became  $\leq 0$  was interpreted as  
162 the point at which individual allele frequencies were no longer spatially autocorrelated. We

163 interpreted this point as the average maximum dispersal distance of island night lizards (e.g.  
164 Yaegashi et al. 2014).

### 165 *Variograms*

166 Variograms assess the spatial autocorrelation of a variable by depicting the semivariance  
167 (defined as half the variance of all pairwise differences) against distance, and may identify the  
168 spatial scale of dispersal processes (Dutech et al. 2008; Le Corre et al 1998). The empirical data  
169 is used to generate a variogram which is then fit with a theoretical variogram with parameters for  
170 nugget (semivariance associated with non-spatial effects), sill (the value at which semivariance  
171 stabilizes), and range (the scale of effect or threshold of spatial independence) (Wagner et al.  
172 2005). There are few guidelines for determining the increment or maximum distances considered  
173 in empirical variograms; therefore, we followed the conventions of using the minimum lag  
174 distances which produced a minimum of 30 observations per bin and limited variograms to one-  
175 half the maximum pairwise distance compared (Rossi et al. 1992). Lag distances differed  
176 between Moran's I and variogram analyses, due to variogram constraint to a smaller maximum  
177 distance.

178 We used the package *phylin* to produce empirical and theoretical variograms. For  
179 theoretical variograms, exponential models were fit to all data sets with the nugget set to the  
180 semivariance of the first distance bin and the remaining parameters estimated within the package.  
181 The variogram approach implemented in *phylin* requires pairwise distance variables; therefore  
182 we evaluated DPS, an inter-individual genetic distance calculated as 1 – proportion of shared  
183 alleles in *adegenet*, and a measure of (un)relatedness by subtracting DyadML values from 1, the  
184 theoretical maximum probability under identity by descent (Milligan 2003).

### 185 *Sex-Biased Dispersal*



186           The methods of Goudet et al (2002) identify a permutation t-test approach to test for sex-  
187 biases in dispersal based on four metrics derived from genetic data of each sex: mean and  
188 variance of the corrected assignment index (mAIC and vAIC, respectively), Fst, and Fis.  
189 However, these methods have been reported to perform well only in the presence of strong sex-  
190 biased dispersal (Goudet et al. 2002). Statistical tests to detect sex bias were conducted in the  
191 package *hierfstat* with the metrics mAIC, vAIC, Fst, and Fis (Goudet et al. 2002). Significance for  
192 comparisons based on mAIC and vAIC were ran with 10,000 permutations whereas tests based on  
193 Fst and Fis were based on 1,000 permutations due to computational constraints.

#### 194 *LRDM*

195           We used an extension of permutation-based LRDM (Prunier et al. 2015) to assess  
196 whether the probability of capturing individuals together could be attributed to the predictors of  
197 pairwise sex, sexual maturity, relatedness, or relationship. We used a binary response variable  
198 with success defined as being captured together. Predictors were pairwise distance matrices with  
199 sex and sexual maturity coded as categorical comparisons.

200           Models were constructed from single variable up to full models; due to the highly  
201 collinear nature of DyadML and COLONY -inferred relationships (data not shown) these  
202 predictors were not included in the same models. Logistic regression models were constructed  
203 with the glm function and a binomial 'logit' link. Nagelkerke's  $R^2$  (Prunier et al. 2015; Smith &  
204 McKenna 2013) was calculated for each model using the NagelkerkeR2 function in the package  
205 *fmsb* and served as the reference distribution statistic for determining significance by permuting  
206 the binary response matrix 10,000 times and recalculating Nagelkerke's  $R^2$  for each permutation.  
207 Semi-standardized beta weights for the full models were calculated as in Prunier et al. (2015)

208 with the odd's ratios calculated as the exponentiated semi-standardized beta weights following  
209 King (2007).

210

## 211 **RESULTS**

212 Mean pairwise distances (Table 2) were significantly different for each relationship group  
213 within both islands ( $p < 2.2 \times 10^{-16}$ ). Mean pairwise distances for full siblings and parent  
214 offspring were not significantly different within either island (SBI  $p=0.1017$ , SCI  $p=0.7566$ ); all  
215 other comparisons were significant at the  $p<0.005$  level. When controlling for young of year  
216 (SVL  $< 40$  mm), mean pairwise distances were significantly different between islands for first-  
217 order relationship ( $p=0.0062$ ) and parent-offspring dyads ( $p=0.0228$ ). When young of year were  
218 included there were no significant differences. When controlling for young of year, mean parent-  
219 offspring distance for SBI was 13.93 m and 40.68 m on SCI.

220 The gene dispersal estimate,  $\sigma$ , ranged between approximately 7 m and 31 m for SBI and  
221 approximately 7 m to 23 m for SCI. Estimates of  $\sigma$  were sensitive to density estimates. However,  
222 estimates of  $\sigma$  were consistent across different distance classes when density was constant and  
223 robust to the inclusion of young of year (Table 1). Constraining density estimates to average  
224 effective density ( $N_e/\text{km}^2$ ) across sample locations resulted in estimates of 16 m for SBI and 19  
225 m for SCI for full data sets and 16 m for SBI and 18 m for SCI when young of year were  
226 removed.

227 Spatial autocorrelation on SBI, as represented by Moran I, was significantly positive  
228 ( $p \leq 0.005$ ) at distances less than 375 m at which Moran's I became negative but not significant  
229 (Figure 1). On SCI, spatial autocorrelation was significantly positive ( $p \leq 0.001$ ) up to distances of  
230 1,395 m and had standard errors overlapping 0 at a distance of 1,813 m (Figure 2). Variograms  
231 based on relatedness had higher support, as indicated by  $R^2$ , than those based on DPS for both

232 islands (Figures 3,4). On SBI, the range for the DyadML variogram was approximately 102 m  
233 whereas SCI had a range estimate of 955 m. The genetic distance measure, DPS, resulted in  
234 greater range estimates on SBI at 169 m and SCI at 1424 m.

235 We found no statistical support for sex-biased dispersal on either island. We utilized  
236 LRDM in both exploratory and predictive contexts. Exploratory analyses revealed that  
237 relatedness and relationship were the only significant predictors of co-capture when controlling  
238 for young of year on each island (Table 3). Pairs of individuals were 1.067 times more likely to  
239 be captured at the same point with a one standard deviation change in DyadML relatedness  
240 estimates on SBI and 1.031 times more likely on SCI. To examine the predictive ability of these  
241 patterns we utilized a traditional logistic regression with SBI as the training dataset and SCI as  
242 the test dataset. This predictive analysis DyadML and COLONY -inferred relationships had high  
243 accuracy (0.9996) and low misclassification (0.0004) rates when predicting capture success  
244 trained on SBI and tested on SCI.

245

## 246 **DISCUSSION**

247 We found inferred parent-offspring distances were between 2 and 13 times greater than  
248 the individual displacement distances of long-term CMR studies of 3 to 6 m (Fellers & Drost  
249 1991; Mautz 1993). We provide the first quantitative estimates of dispersal distances in the  
250 species (14 m on SBI and 41 m on SCI) and found spatial autocorrelation of allele frequencies,  
251 genetic distance, and relatedness at previously unrecorded scales. The LRDM approach of  
252 Prunier et al. (2015) resulted in relatedness and relationships being the strongest predictors of  
253 island night lizard co-captures, suggesting a social structure with kin-affiliative behavior.

254 *Distances Between First-Order Relatives*

255 Fellers and Drost (1991) found 12 juveniles on SBI 30 to 40 m from prime habitat over a  
256 6 year study and surmised these represented juvenile dispersal, whereas individual recapture data  
257 suggested average displacements of 5.6 m. While there is no indication of juvenile dispersal  
258 distances for SCI, Mautz (1993) found that individual relocations to be only an average of 3 m  
259 apart, with the longest recorded displacement at 18.5 m. Our findings provide the first  
260 quantitative estimates of juvenile dispersal distances, although the distance between parent-  
261 offspring pairs is approximately 3 times shorter than the estimates of Fellers and Drost (1991).  
262 However, our estimates of dispersal distance are approximately 2.5 times greater than the  
263 individual movement distances on SBI and 13 times greater than those on SCI.

264 Moore et al. (2014) and Dussex et al. (2016) both found parentage analyses more  
265 accurate in describing dispersal ecology than alternate genetic methods. Our results support the  
266 utility of parentage and kinship analyses in characterizing natal movement, especially when  
267 focused on parent-offspring pairs. Estimation of first-order relationships as described in Rice and  
268 Clark (2016) and their pairwise differences may be informative in the characterization of  
269 dispersal when few parent-offspring comparisons are available. Comparisons of mean pairwise  
270 distance for COLONY -inferred relationships were not significantly different between parent-  
271 offspring or full sibling groups for either island. The mean distances inferred for first-order  
272 relationships differed between islands, potentially due to differences in island scale and  
273 population densities. It is notable that the maximum distance between first-order relatives is very  
274 close (SBI=158.63 m, SCI=156.75 m) between both islands, although these maximums belong to  
275 different relationship groups (full sibling and parent-offspring respectively) for each island.

276 *Gene Dispersal Distances*

277 Estimates of gene dispersal were also remarkably close between each island at the same  
278 lag distances and density estimate methods. Comparing these two metrics, distances from  
279 inferred parentage and sigma estimated distances were within 3 m on SBI and SCI when  
280 evaluating distances with young of year included, and remained consistent when young of year  
281 were excluded. The discrepancy between parent-offspring distance and  $\sigma$  for SCI when  
282 controlling for young of year may be attributable to changes in sample size and analytical  
283 method. Future research should consider simulation-based approaches to evaluate the accuracy  
284 of these metrics compared to the known simulation parameters; however, in the context of  
285 estimating parameters for natural populations characterized by an isolation by distance pattern,  
286 parentage analyses and  $\sigma$  both appear to yield consistent results.

#### 287 *Spatial Autocorrelation*

288 Spatial autocorrelation analyses, such as Moran's I, have been used to understand the  
289 scale of autocorrelation for individual allele frequencies and interpret this scale as a measure of  
290 dispersal (e.g. Epperson & Li 1997; Yaegashi et al. 2014). The interpretation of the  
291 correlogram's x-intercept as average maximum dispersal distance is uncommon in the literature,  
292 and generally noted as the scale at which allele frequencies are become spatially independent.  
293 This method returned notable differences between islands, with SBI reaching this point at 375 m  
294 and SCI at 1,813 m. These scales are much larger than the displacement estimates from long-  
295 term field studies and are also much larger than our dispersal estimates from parentage analyses  
296 and  $\sigma$ . Thus, we recommend that studies focused on estimating dispersal distances should favor  
297 parentage analyses or gene dispersal distances over spatial autocorrelation analyses.

#### 298 *Variograms*

299 Estimates using variograms were also incongruent with parentage analyses, but provided  
300 smaller estimates of the scale of spatial autocorrelation than Moran's I. The use of variograms to  
301 estimate dispersal has not been formally studied. These estimates could denote the scale of  
302 spatial genetic structure (Wagner et al. 2005), connectivity among localized groups (Le Corre et  
303 al. 1998), or the "patch size" of the process evaluated (Legendre & Fortin 1989). Because we  
304 generated distance measures from the proportion of shared alleles and relatedness our estimates  
305 may denote the "patch size" of relatedness, or may indicate familial territories. More meaningful  
306 biological interpretation of these field studies using long-term telemetry paired with parentage  
307 analyses would provide data on individual movement necessary for more thorough interpretation  
308 of genetic patterns. However, simulation-based approaches may offer a more tractable solution to  
309 determine whether range estimates produced from spatial autocorrelation and variogram analyses  
310 are congruent with known or simulated dispersal patterns.

### 311 *LRDM*

312 The results of LRDM indicate that pairwise relatedness and relationships are the best  
313 predictors of capturing individuals together. Due to the late spring and summer sampling on SBI  
314 the removal of young of year individuals had little effect on the pseudo- $R^2$  or odds ratio.  
315 However, extensive sampling on SCI during the autumn to capture neonates and associated  
316 adults impacted both the pseudo- $R^2$  and odds ratio for relatedness, but this remained a significant  
317 predictor even after removal of young of year. The continued association of relatives after the ca.  
318 0.8 year mark suggests a level of previously undocumented sociality within the system, which  
319 may explain the strong signals of isolation by distance reported by Rice and Clark (2016).

320 Cryptic sociality and kin affiliation has been noted for the sister species (*X. vagilis*) on  
321 the mainland, in which fostering was demonstrated to effect philopatry and kin-affiliative

322 behaviors through delayed dispersal (Davis 2011; Davis et al. 2010). The studies of Davis et al.  
323 (2010) highlight several similarities shared between the two species, including dense  
324 populations, low dispersal, and small home range sizes. Thus, our findings suggest island night  
325 lizards may also form kin groups through delayed juvenile dispersal and prolonged parent-  
326 offspring interactions as noted by Davis et al. (2010). Some reclusive reptiles that are social also  
327 exhibit parental care, such as attendance of neonates in egg-guarding lizards (e.g. Huang 2006;  
328 Mateo & Cuadrado 2012) or maternal attendance of pre-ecdysis neonates in pit-vipers (e.g.  
329 Greene et al. 2002; Hoss et al. 2015). Given the frequent and prolonged association between  
330 adults and neonates, it is possible *X. riversiana* also exhibits parental care. Although predators on  
331 both islands are limited, attending parents could protect neonates from intra-specific aggression.  
332 Unsurprisingly, samples collected in autumn most frequently included neonates and associated  
333 adults as parturition occurs seasonally (Fellers & Drost 1991; Mautz 1993). However, the  
334 association of related island night lizards extending beyond this parturition period warrant further  
335 investigation into the extent of their social structure and affiliative behaviors.

### 336 *Conservation Implications*

337 Our characterization of dispersal ecology of the island night lizard suggests scale  
338 dependent effects and supports the independent management of each island. On SBI, we found  
339 parent-offspring distances of approximately 14 m and spatial autocorrelation up to 375 m  
340 whereas dispersal distances on SCI were 41 m with spatial autocorrelation up to 1,813 m. These  
341 distance estimates will be useful for the management and post-delisting monitoring of  
342 populations on both islands (USFWS 2014). We suggest management actions should maintain  
343 population sizes and meta-population connectivity, and that the spatial scales derived from our  
344 spatial autocorrelation analyses be used to guide those actions. On SBI, a scale of 100 m to 375

345 m should be used as a focus for remediation efforts, such as direct-line connectivity between  
346 habitat patches. On SCI, management should focus at the scales of 1-2 km in efforts to connect  
347 remote patches through corridors of prime habitat, as opposed to replanting isolated or remote  
348 patches. Furthermore, these findings can inform the design and mitigation of increased  
349 infrastructure by identifying patches that would become disconnected at these scales under  
350 increased development.

### 351 *Conclusions*

352         Dispersal is a key factor in the life history of a species, and a key parameter affecting  
353 conservation and management decisions (Bowler & Benton 2005; Hawkes 2009). Although  
354 dispersal can be directly observed, it is often labor and time intensive. Indirect inference of  
355 dispersal based on genetic evidence is gaining in application but lacks a framework for consistent  
356 and reliable inference. Studies utilizing both CMR and genetic inference methods have found  
357 that CMR methods generally underestimate dispersal distances, while assignment methods on  
358 genetic data can often overestimate dispersal and conflict with direct observations (e.g. Dussex et  
359 al. 2016). The application of genetic inference methods to estimate dispersal is likely to be a  
360 valuable tool for conservation management in understanding the scale of dispersal processes and  
361 the potential effects of management actions on connectivity. However, we have demonstrated  
362 that different inference methods may yield very different results which may lead to incorrect  
363 inferences and misspecification of parameters, rendering management actions ineffectual  
364 (Bowler & Benton 2005; Jackson & Fahrig 2014). Recent studies found parentage analyses to be  
365 the most accurate method for characterizing dispersal ecology, and our analyses of the island  
366 night lizard support this usage. Furthermore, our findings suggest that natal dispersal parameters  
367 should not be derived from spatial autocorrelation or variogram analyses as the parameters



368 inferred are highly variable and likely overestimate dispersal in the context of individual  
369 movement. However, these approaches may yield insight into the scale of fine-scale patterns  
370 relevant to conservation and suggest a minimum scale below which individuals are likely to be  
371 related and thus management actions may be confounded (e.g. Jackson & Fahrig 2014).

372

### 373 **LITERATURE CITED**

374 Bowler DE, Benton TG (2005) Causes and consequences of animal dispersal strategies: relating  
375 individual behavior to spatial dynamics. *Biological Reviews of the Cambridge*  
376 *Philosophical Society*, 80, 205-225.

377 Broquet T, Petit EJ (2009) Molecular estimation of dispersal for ecology and population  
378 genetics. *Annual Review of Ecology, Evolution, and Systematics*, 40, 193-216.

379 Davis AR (2010) Kin presence drives philopatry and social aggregation in juvenile Desert Night  
380 Lizards (*Xantusia vigilis*). *Behavioral Ecology*, doi: 10.1093/beheco/arr144

381 Davis AR, Corl A, Surget-Groba Y, Sinervo B (2011) Convergent evolution of kin-based  
382 sociality in a lizard. *Proceedings of the Royal Society B*, doi:10.1098/rspb.2010.1703

383 Do C, Waples RS, Peel D, Macbeth GM, Tillett BJ, Ovenden JR (2014) NeEstimator V2: re-  
384 implementation of software for the estimation of contemporary effective population size  
385 (Ne) from genetic data. *Molecular Ecology Resources*, 14, 209-214.

386 Dussex N, Broquet T, Yearsley JM (2016) Contrasting dispersal inference methods for the  
387 greater white-toothed shrew. *The Journal of Wildlife Management*, 80, 812-823.

388 Dutech C, Rossi JP, Fabreguettes O, Robin C (2008) Geostatistical genetic analysis for inferring  
389 the dispersal pattern of a partially clonal species: example of the chestnut blight fungus.

390 *Molecular Ecology*, 17, 4597-4607.

- 391 Epperson B, Li T (1997) Gene Dispersal and Spatial Genetic Structure. *Evolution*, 51(3), 672-  
392 681.
- 393 Fellers GM, Drost CA (1991) Ecology of the island night lizard, *Xantusia riversiana*, on SBI,  
394 California. *Herpetological Monographs*, 5, 28-78.
- 395 Goudet J, Perrin N, Waser P (2002) Tests for sex-biased dispersal using bi-parentally inherited  
396 genetic markers. *Molecular Ecology*, 11, 1103-1114.
- 397 Goudet J, Jombart T (2015) R package ‘hierfstat’: estimation and tests of hierarchical F-statistics  
398 version 0.04-22
- 399 Greene HW, May PGDL, Hardy S, Sciturreo JM, Farrell TM (2002) Parental behaviors by pit  
400 vipers. G.W. Schuett, M. Hoggren, M.E. Douglas, H.W. Greene (Eds.), *Biology of the*  
401 *Vipers*, Eagle Mountain Publications, Eagle Mountain, Utah (2002), pp. 179–225.
- 402 Hardy OJ, Vekemans X (1999) Isolation by distance in a continuous population: reconciliation  
403 between spatial autocorrelation analysis and population genetics models. *Heredity*, 83,  
404 145-154.
- 405 Hardy OJ, Vekemans X (2002) SPAGeDi: a versatile computer program to analyse spatial  
406 genetic structure at the individual or population levels. *Molecular Ecology Notes*, 2, 618-  
407 620.
- 408 Hardy OJ, Maggia L, Bandou E, Breyne P, Caron H, Chevallier MH, Doligez A, Dutech C,  
409 Kremer A, Latouche-Halle C, Troispoux V, Veron V, Degen B (2006) Fine-scale genetic  
410 structure and gene dispersal inferences in ten neotropical tree species. *Molecular*  
411 *Ecology*, 15, 559-571.
- 412 Hawkes C (2009) Linking movement behavior, dispersal, and population processes: is individual  
413 variation a key? *Journal of Animal Ecology*, 78, 894-906.

- 414 Hill WG (1981) Estimation of effective population size from data on linkage disequilibrium.  
415 *Genetical Research*, 38, 209-216.
- 416 Hothorn T, Hornik K, van de Wiel MA, Zeileis A (2006) A lego system for conditional  
417 inference. *The American Statistician*, 60, 257-263.
- 418 Hoss SK, Deutschman DH, Booth W, Clark RW (2015) Post-birth separation affects the  
419 affiliative behavior of kin in a pitviper with maternal attendance. *Biological Journal of*  
420 *the Linnean Society*, 116, 637-648.
- 421 Huang W (2006) parental care in the long-tailed skink, *Mabuya longicaudata*, on a tropical  
422 Asian island. *Animal Behaviour*, 72, 791-795.
- 423 Jackson ND, Fahrig L (2014) Landscape context affects genetic diversity at a much larger spatial  
424 extent than population abundance. *Ecology*, 95, 871-881.
- 425 Jombart T (2008) Adegnet: a R package for the multivariate analysis of genetic markers.  
426 *Bioinformatics* 24:1403-1405.
- 427 Jones OR, Wang J (2010) Colony: a program for parentage and sibship inference from  
428 multilocus genotype data. *Molecular Ecology Resources*, 10,551-555.
- 429 Kalinowski ST, Taper ML, Marshall TC (2007) Revising how the computer program CERVUS  
430 accommodates genotyping error increases success in paternity assignment. *Molecular*  
431 *Ecology*, 16, 1099-1106.
- 432 King JE (2007) Standardized Coefficients in Logistic Regression. Annual meeting of the  
433 Southwest Educational Research Association, San Antonio, Texas.
- 434 Le Corre V, Roussel G, Zanetto A, Kremer A (1998). Geographical structure of gene diversity in  
435 *Quercus petraea* (Matt.) Liebl. III. Patterns of variation identified by geostatistical  
436 analyses. *Heredity*, 80, 464-473.

- 437 Legendre P, Fortin MJ (1989) Spatial pattern and ecological analysis. *Vegetatio*, 80,107-138.
- 438 Manel S, Gaggiotti OE, Waples RS (2005) Assignment methods: matching biological questions  
439 with appropriate techniques. *Trends in Ecology and Evolution*, 20, 136-142.
- 440 Mateo JA, Cuadrado M (2012) Communal nesting and parental care in Oudri's fan-footed gecko  
441 (*Ptyodactylus oudrii*): field and experimental evidence of an adaptive behavior. *Journal*  
442 *of Herpetology*, 46, 209-212.
- 443 Mautz WJ (1993) Ecology and energetics of the island night lizard, *Xantusia riversiana*, on SCI,  
444 California. In: Third California Islands symposium: Recent advances in research on the  
445 California Islands (ed Hochberg FG), pp. 417-428. SBI Museum of Natural History, SBI,  
446 CA.
- 447 Milligan BG (2003) Maximum-likelihood estimation of relatedness. *Genetics*, 163, 1153-1167.
- 448 Moore JA, Draheim HM, Etter D, Winterstein S, Scribner KT (2014) Application of large-scale  
449 parentage analysis for investigating natal dispersal in highly vagile vertebrates: a case  
450 study of American black bears (*Ursus americanus*). PLoS ONE 9:e91168.
- 451 Nakazawa M (2015) R package 'fmsb': functions for medical statistics book with some  
452 demographic data version 0.5.2.
- 453 Pimm SL, Alibhai S, Bergl R, Dehgan A, Giri C, Jewell Z, Joppa L, Kays R, Loarie S (2015)  
454 Emerging technologies to conserve biodiversity. *Trends in Ecology and Evolution*,  
455 30,685-696.
- 456 Prunier JG, Colyn M, Legendre X, Nimon KF, Flamand MC (2015) Multicollinearity in spatial  
457 genetics: separating the wheat from the chaff using commonality analyses. *Molecular*  
458 *Ecology*, 24, 263-283.

- 459 R Core Team (2016) R: A language and environment for statistical computing. R Foundation for  
460 Statistical Computing, Vienna, Austria. Available online: <https://www.R-project.org/>.
- 461 Rice SE, RW Clark (2016) Factors affecting intra-island genetic connectivity and diversity of an  
462 abundant and widespread island endemic, the SCI night lizard. In Review, *Conservation*  
463 *Genetics*; bioarxiv doi: <http://dx.doi.org/10.1101/060038>.
- 464 Rice SE, Beasley RR, Lance SL, Jones KL, Clark RW (2016) Development of 24 polymorphic  
465 microsatellite markers for the Island Night Lizard (*Xantusia riversiana*) in Microsatellite  
466 records for volume 8, issue 2. *Conservation Genetic Resources*, 8,169-196 doi: 10.1007/  
467 s12686-016-0549-4.
- 468 Rossi RE, Mulla DJ, Journel AG, Franz EH (1992) Geostatistical tools for modeling and  
469 interpreting ecological spatial dependence. *Ecological Monographs*, 62, 277-314.
- 470 Rousset F (2000) Genetic differentiation between individuals. *Journal of Evolutionary Biology*,  
471 13, 58-62.
- 472 Smith TJ, McKenna CM (2013) A comparison of logistic regression pseudo R<sup>2</sup> indices. *Multiple*  
473 *Linear Regression Viewpoints*, 39, 17–26.
- 474 Tarroso P, Velo-Anton G, Carvalho SB (2015) phylin: an r package for phylogeographic  
475 interpolation. *Molecular Ecology Resources*, 15, 349-357.
- 476 United States Fish and Wildlife Service (2014) Island night lizard (*Xantusia riversiana*) final  
477 Post-Delisting Monitoring Plan. U.S. Fish and Wildlife Service, Carlsbad Fish and  
478 Wildlife Office, Carlsbad, California.
- 479 Wagner HH, Holderegger R, Werth S, Gugerli F, Hoebee SE, Scheidegger C (2005) Variogram  
480 analysis of the spatial genetic structure of continuous populations using multilocus  
481 microsatellite data. *Genetics*, 169:1739-1752.

- 482 Wang J (2011) Coancestry: a program for simulating, estimating and analyzing relatedness and  
483 inbreeding coefficients. *Molecular Ecology Resources*, 11,141-145.
- 484 Wright S (1946) Isolation by distance under diverse systems of mating. *Genetics*, 31, 39-59.
- 485 Yaegashi S, Watanabe K, Monaghan MT, Omura T (2014) Fine-scale dispersal in a stream  
486 caddisfly inferred from spatial autocorrelation of microsatellite markers. *Freshwater*  
487 *Science*, 33, 172-180.

## TABLES

**Table 1: Isolation by Distance Model Results.** Results from the program SPAGEDI for estimation of Wright's  $\sigma$ . Islands were estimated independently (SBI=Santa Barbara Island, SCI=San Clemente Island). Density (De) was estimated as individuals/km<sup>2</sup> by considering the census population size (Nc) and island area, average for effective density across sampling locations (Ne) with 95% confidence intervals (Ne-LCI=lower, Ne-UCI=upper), and census population size over prime habitat area (Ncp). Lag distance refers to the increment of distance bins (m). SPAGEDI estimated the number of breeders (Nb) and  $\sigma$  (m); standard errors in parentheses for each parameter were estimated by jackknifing over loci. Two data sets were ran for each island, the full data set (All Individuals) and a data set in which the young of year were removed (>40 SVL Individuals).

| Island | Density Method | De        | Lag | All Individuals |            | >40 SVL Individuals |            |
|--------|----------------|-----------|-----|-----------------|------------|---------------------|------------|
|        |                |           |     | Nb              | $\sigma$   | Nb                  | $\sigma$   |
| SBI    | Nc             | 6795.37   | 25  | 79.52 (7.69)    | 30.5 (1.5) | 79.44 (7.70)        | 30.5 (1.5) |
|        | Ncp            | 167619.00 | 25  | 96.33 (48.17)   | 6.8 (1.7)  | 104.63 (44.95)      | 7.0 (1.5)  |
|        | Ne – LCI       | 19157.91  | 25  | 77.22 (14.06)   | 17.9 (1.6) | 79.90 (12.04)       | 18.2 (1.4) |
|        | Ne – UCI       | 33679.07  | 25  | 81.58 (12.24)   | 13.9 (1.0) | 84.23 (16.04)       | 14.1 (1.3) |
|        | Ne             | 24291.60  | 25  | 75.58 (11.87)   | 15.7 (1.2) | 78.57 (16.44)       | 16.0 (1.7) |
|        | Ne             | 24291.60  | 50  | 75.58 (11.87)   | 15.7 (1.2) | 78.57 (16.44)       | 16.0 (1.7) |
|        | Ne             | 24291.60  | 200 | 75.58 (11.87)   | 15.7 (1.2) | 78.57 (16.44)       | 16.0 (1.7) |
| SCI    | Nc             | 141490.60 | 50  | 151.03 (26.84)  | 9.2 (0.8)  | 142.58 (17.30)      | 9.0 (0.5)  |
|        | Ncp            | 267991.90 | 50  | 163.56 (37.09)  | 7.0 (0.8)  | 140.68 (23.15)      | 6.5 (0.5)  |
|        | Ne – LCI       | 23016.35  | 50  | 159.12 (54.55)  | 23.5 (4.0) | 140.85 (61.86)      | 22.1 (4.8) |
|        | Ne – UCI       | 182711.40 | 50  | 159.00 (22.51)  | 8.3 (0.6)  | 152.20 (26.53)      | 8.1 (0.7)  |
|        | Ne             | 34631.00  | 50  | 160.18 (44.80)  | 19.2 (2.7) | 133.94 (44.96)      | 17.5 (2.9) |
|        | Ne             | 34631.00  | 100 | 160.18 (44.80)  | 19.2 (2.7) | 133.94 (44.96)      | 17.5 (2.9) |
|        | Ne             | 34631.00  | 200 | 160.18 (44.80)  | 19.2 (2.7) | 133.94 (44.96)      | 17.5 (2.9) |

**Table 2: Pairwise Distances among Relatives.** Islands are indicated as Santa Barbara Island (SBI) or San Clemente Island (SCI). Relationships were first-order (FO, based on Rice and Clark (2016)), COLONY inferred relationships of parent-offspring (PO), full sibling (FS), half sibling (HS) or unrelated (U). For each relationship, the number of pairwise comparisons (N), mean (Mean), standard deviation (Sd), median (Median), and maximum (Max) distance values (m). The P column is the approximated p-value comparing the same Relationships between islands. The lower half of the table displays values for each island with young of year samples (>40mm SVL) removed.

|                     | <b>SBI</b>                |             |           |               |            | <b>SCI</b>                |             |           |               |            |          |
|---------------------|---------------------------|-------------|-----------|---------------|------------|---------------------------|-------------|-----------|---------------|------------|----------|
| <b>Relationship</b> | <b>N</b>                  | <b>Mean</b> | <b>Sd</b> | <b>Median</b> | <b>Max</b> | <b>N</b>                  | <b>Mean</b> | <b>Sd</b> | <b>Median</b> | <b>Max</b> | <b>P</b> |
| FO                  | 44                        | 16.55       | 25.25     | 10.14         | 158.63     | 74                        | 21.82       | 36.61     | 2.91          | 156.75     | 0.4109   |
| PO                  | 20                        | 13.93       | 13.24     | 9.50          | 42.49      | 52                        | 20.64       | 40.44     | 1.00          | 156.75     | 0.4815   |
| FS                  | 14                        | 24.90       | 39.70     | 12.93         | 158.63     | 33                        | 22.42       | 30.00     | 4.55          | 95.29      | 0.8244   |
| HS                  | 418                       | 243.25      | 404.76    | 38.86         | 1862.69    | 686                       | 3480.46     | 5961.83   | 132.95        | 26465.22   | <2.2e-16 |
| U                   | 48064                     | 831.05      | 502.81    | 778.79        | 2368.02    | 171220                    | 11285.37    | 8175.89   | 9670.69       | 28258.99   |          |
|                     | <b>SBI &gt; 40 mm SVL</b> |             |           |               |            | <b>SCI &gt; 40 mm SVL</b> |             |           |               |            |          |
| <b>Relationship</b> | <b>N</b>                  | <b>Mean</b> | <b>Sd</b> | <b>Median</b> | <b>Max</b> | <b>N</b>                  | <b>Mean</b> | <b>Sd</b> | <b>Median</b> | <b>Max</b> | <b>P</b> |
| FO                  | 44                        | 16.55       | 25.25     | 10.14         | 158.63     | 43                        | 37.18       | 41.86     | 16.90         | 156.75     | 0.0062   |
| PO                  | 20                        | 13.93       | 13.24     | 9.50          | 42.49      | 26                        | 40.68       | 49.99     | 12.79         | 156.75     | 0.0228   |
| FS                  | 14                        | 24.90       | 39.70     | 12.93         | 158.63     | 19                        | 38.01       | 31.51     | 25.61         | 95.29      | 0.3005   |
| HS                  | 391                       | 236.72      | 402.38    | 37.31         | 1862.69    | 613                       | 3447.68     | 5994.7    | 136.08        | 26465.22   | <2.2e-16 |
| U                   | 45631                     | 836.88      | 502.73    | 783.46        | 2368.02    | 141120                    | 11193.78    | 7949.20   | 9667.75       | 28258.99   |          |



**Table 3: Logistic Regression on Distance Matrices Results.** LRDM was conducted separately for each island (SBI=Santa Barbara Island, SCI=San Clemente Island) and for each data set with all individuals (All Samples) or controlled by removal of young of year (>40mm SVL). LRDM was conducted on each predictor variable (Model) independently to determine significance (p-value) through permutation and model support by Nagelkerke's  $R^2$  ( $R^2$ ). Odds-ratios (Odds-ratio) were computed from 3-variable models in which either the DyadML estimator (Dyad) or COLONY-inferred relationships were used (COLONY) due to the collinear nature of relatedness and relationship. Since the predictors of sex and maturity were used in 2 3-variable models both odds ratios are listed with the forward slash separating the DyadML model from the COLONY relationship model. The predictors of sex and maturity were categorical matches between male and female (sex) and sexually mature and immature individuals (Maturity).

| Model         | SBI         |                   |       |           |                   |       | SCI         |                   |       |           |                   |       |
|---------------|-------------|-------------------|-------|-----------|-------------------|-------|-------------|-------------------|-------|-----------|-------------------|-------|
|               | All Samples |                   |       | >40mm SVL |                   |       | All Samples |                   |       | >40mm SVL |                   |       |
|               | p-value     | Odds-ratio        | $R^2$ | p-value   | Odds-ratio        | $R^2$ | p-value     | Odds-ratio        | $R^2$ | p-value   | Odds-ratio        | $R^2$ |
| <i>Dyad</i>   | 0.0001      | 1.0644            | 0.112 | 0.0001    | 1.0659            | 0.112 | 0.0001      | 1.4373            | 0.339 | 0.0001    | 1.0307            | 0.081 |
| <i>COLONY</i> | 0.0001      | 1.7004            | 0.089 | 0.0001    | 1.7316            | 0.089 | 0.0001      | 0.9969            | 0.392 | 0.0001    | 0.9990            | 0.073 |
| Sex           | 0.6845      | 1.3120/<br>2.4283 | 0.008 | 0.7005    | 1.3265/<br>2.4386 | 0.008 | 0.0001      | 1.0006/<br>1.0003 | 0.018 | 0.3911    | 1.0003/<br>1.0002 | 0.005 |
| Maturity      | 0.9356      | 1.3259/<br>1.2964 | 0.001 | 0.8512    | 1.3409/<br>1.3139 | 0.001 | 0.0033      | 1.0005/<br>0.9799 | 0.009 | 0.6900    | 1.0003/<br>0.9959 | 0.001 |

## FIGURES

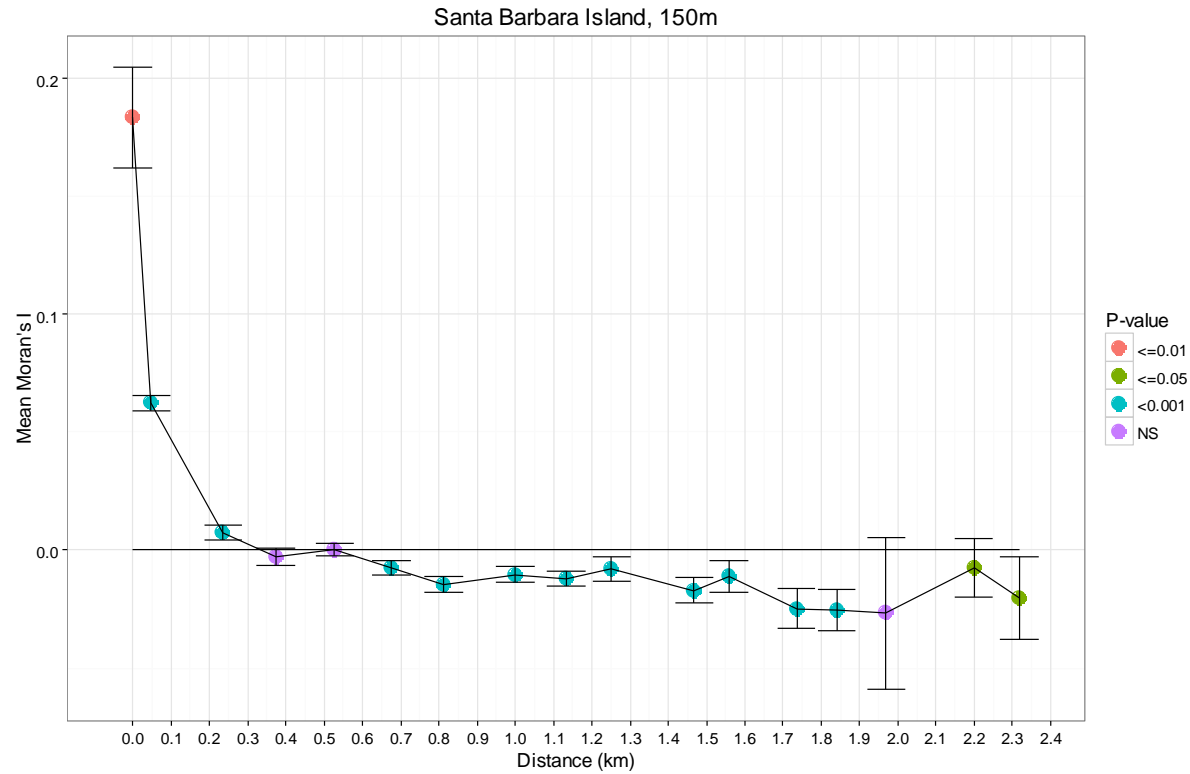

**Figure 1: Correlogram of Moran's I on Santa Barbara Island.** Moran's I was calculated for each distance bin and significance assessed through permutation. Points represent the value of Moran's I for the mean distance within each 150 m distance interval. Bars indicate standard error around the mean while each point color indicates significance of correlation within each point.

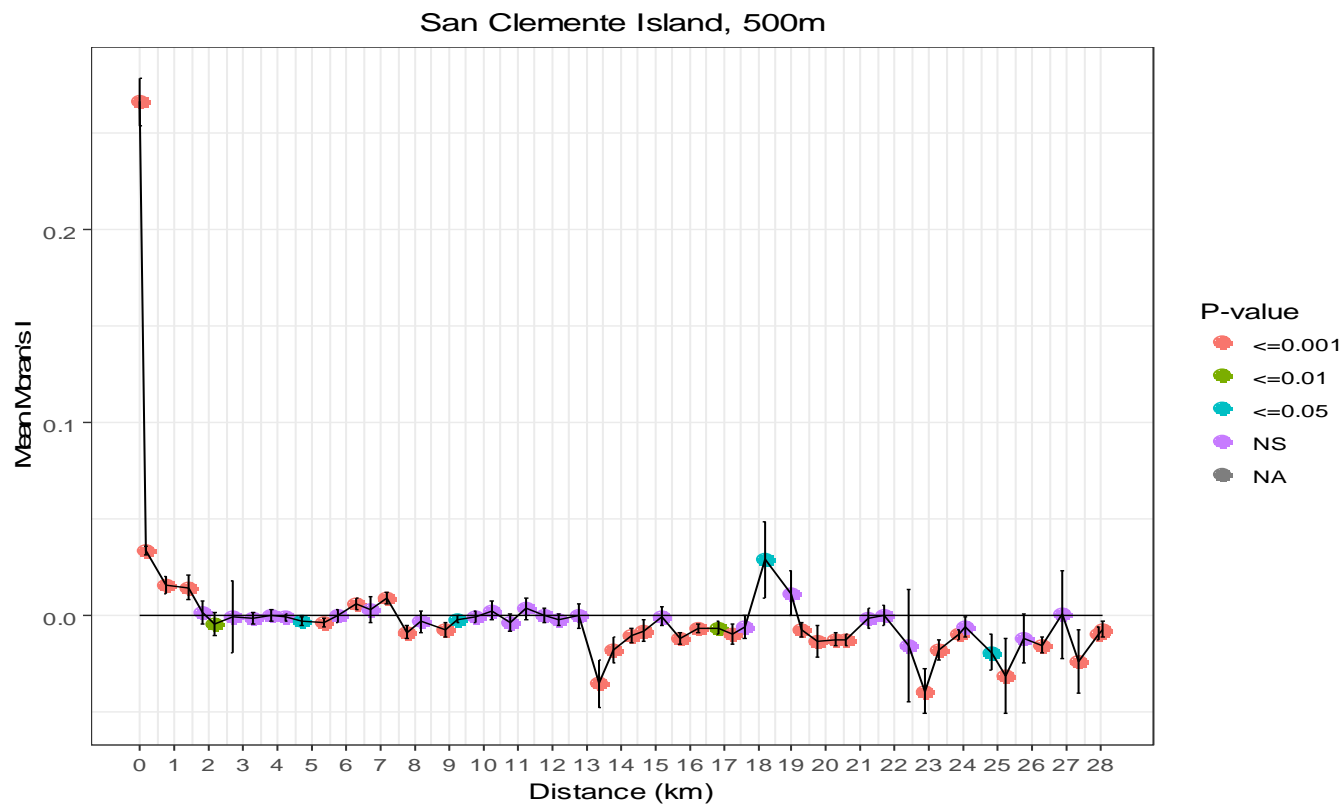

**Figure 2: Correlogram of Moran's I on San Clemente Island.** Moran's I was calculated for each distance bin and significance assess through permutation. Points represent the value of Moran's I for the mean distance within each 500 m distance interval. Bars indicate standard error around the mean while each point color indicates significance of correlation within each point.

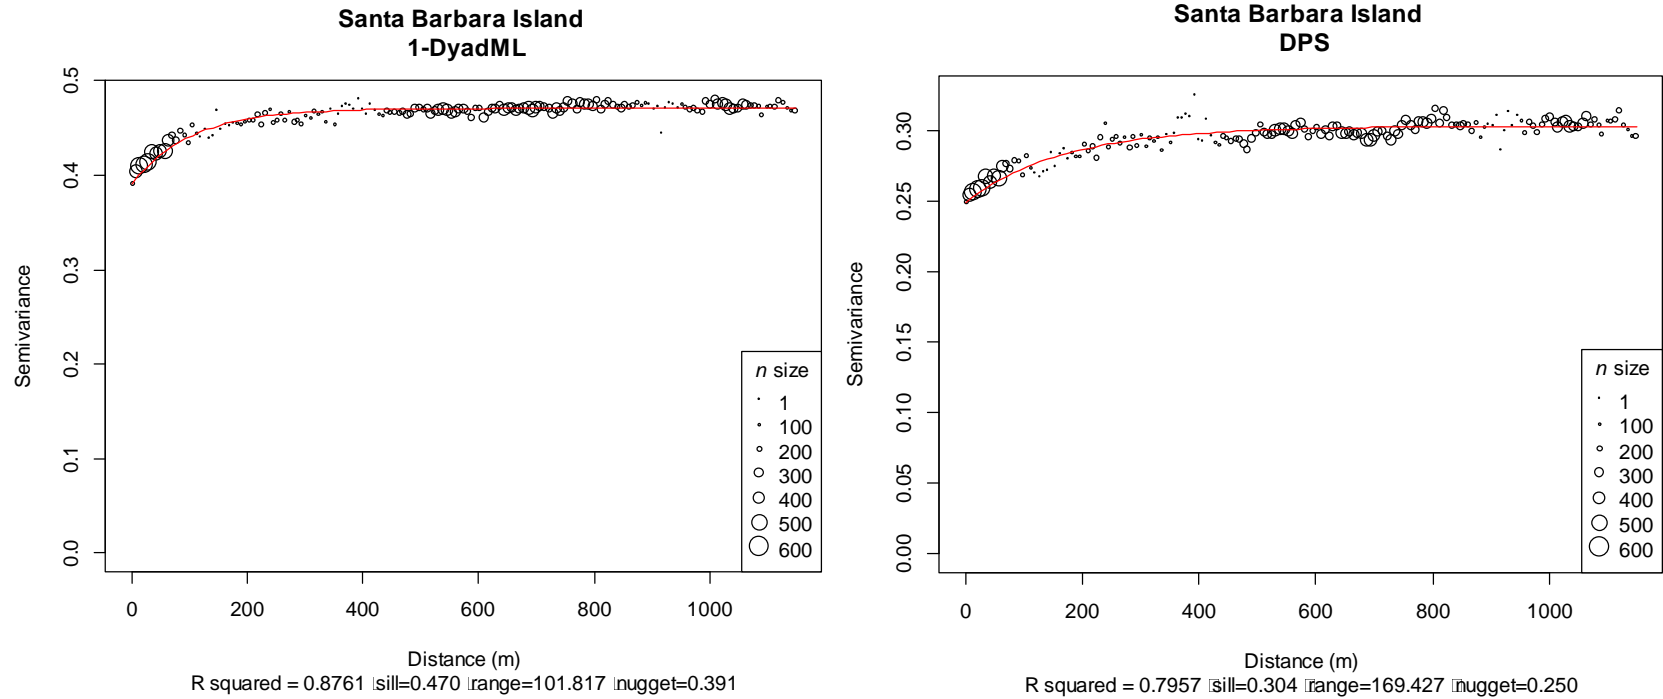

**Figure 3: Variogram Analyses for Santa Barbara Island.** Empirical variograms (circles) were generated from two distance measures: left) 1-DyadML relatedness estimates, right) Inter-individual genetic distance DPS. Circle size denotes the number of pairwise comparisons within each distance class. Maximum distance evaluated was 1,100 m with a lag distance of 7 m for both variables. Theoretical variograms (red line) were fit as fixed-nugget models. Model  $R^2$  values were used as a measure of model support and the point of spatial independence is denoted by the range.

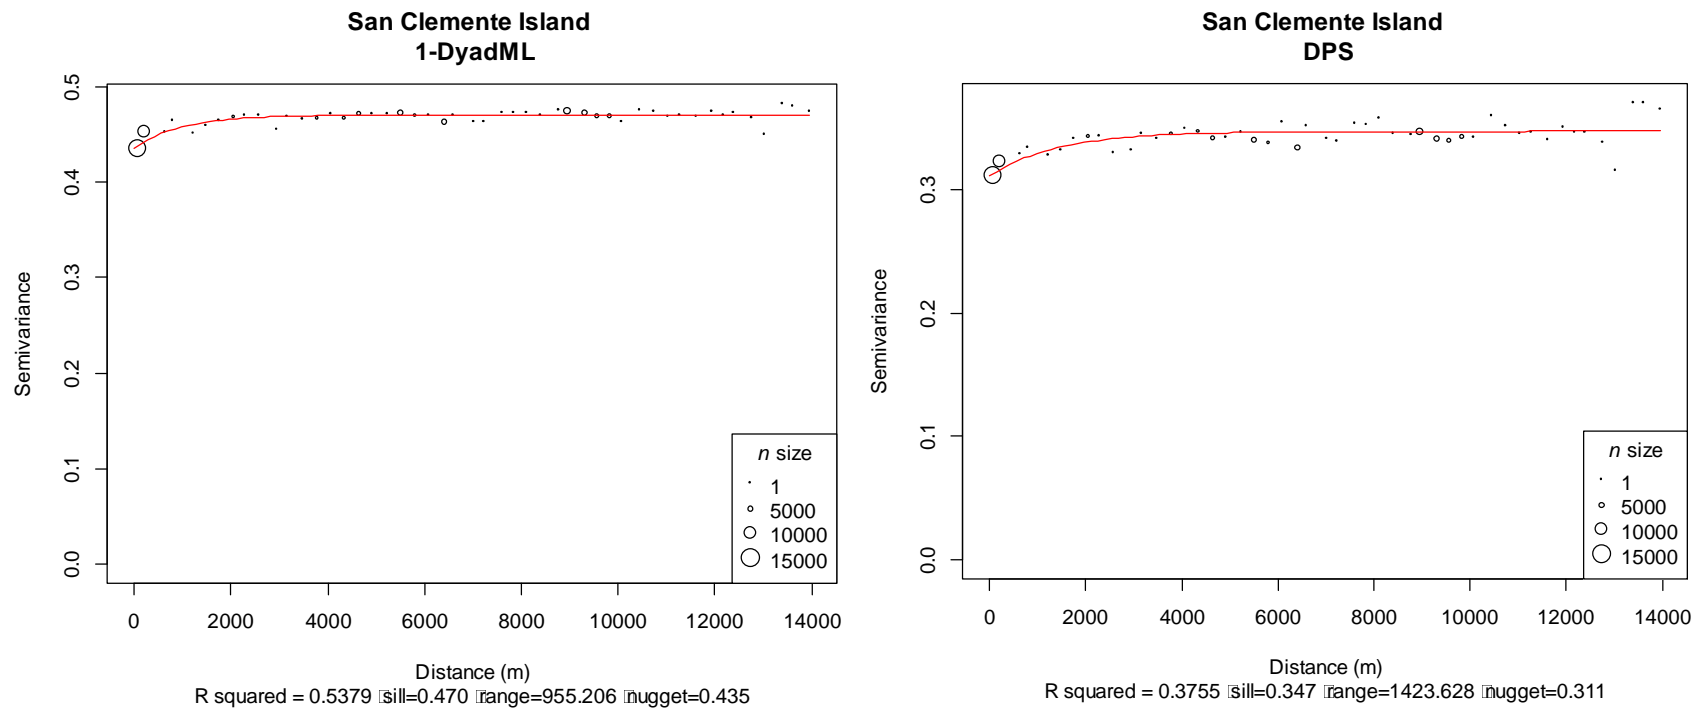

**Figure 4: Variogram Analyses for San Clemente Island.** Empirical variograms (circles) were generated from two distance measures: left) 1-DyadML relatedness estimates, right) Inter-individual genetic distance DPS. Circle size denotes the number of pairwise comparisons within each distance class. Maximum distance evaluated was 14,000 m with a lag distance of 290 m for both variables. Theoretical variograms (red line) were fit as fixed-nugget models. Model  $R^2$  values were used as a measure of model support and the point of spatial independence is denoted by the range.

## SUPPLEMENTALS: RAW DATA GRAPHS

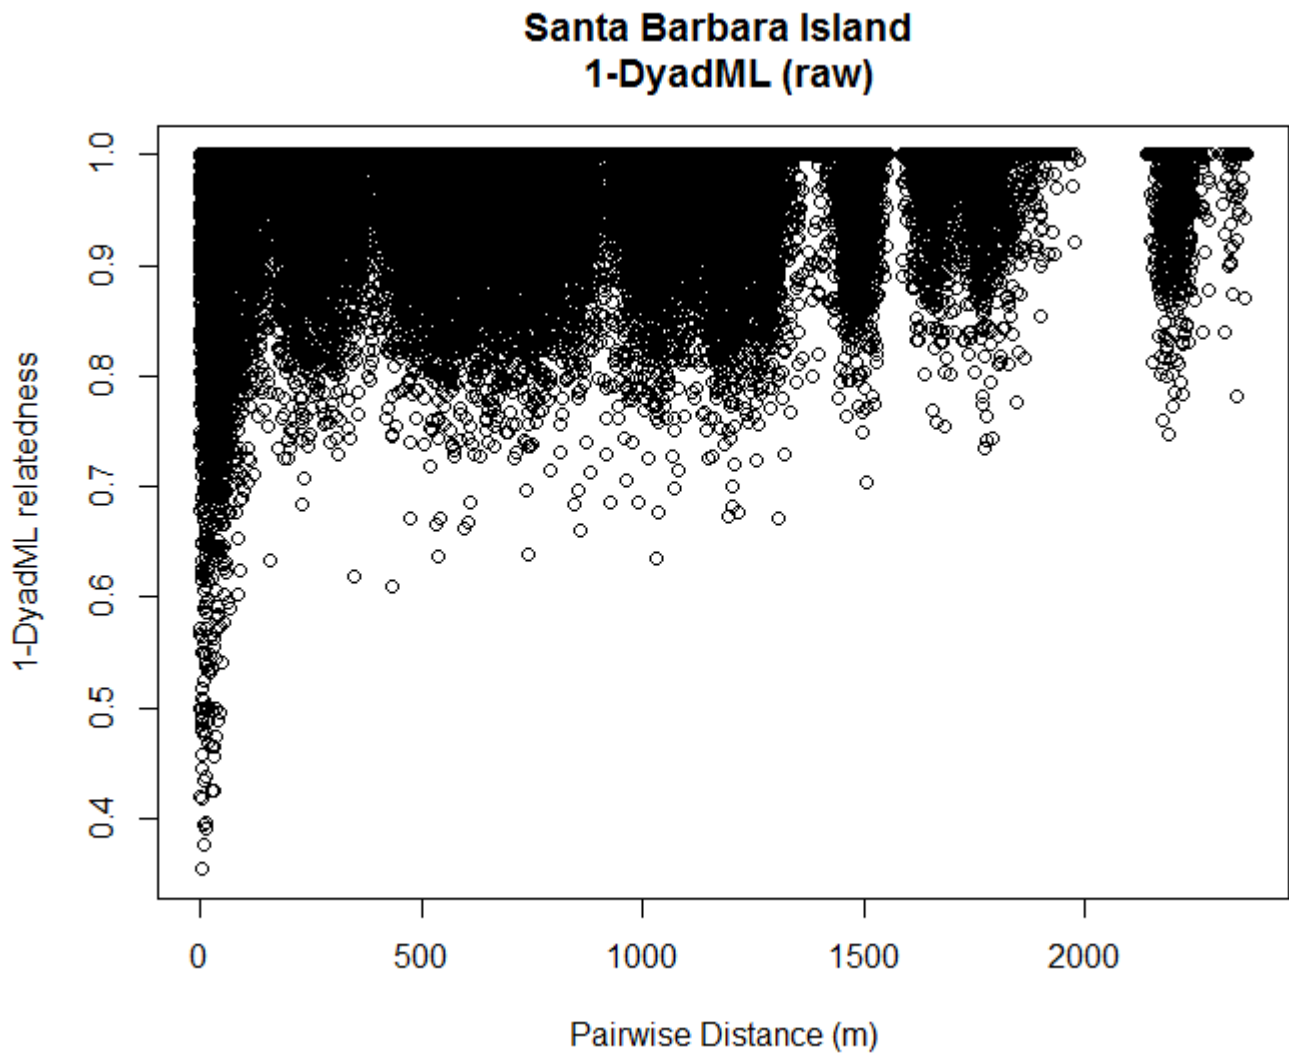

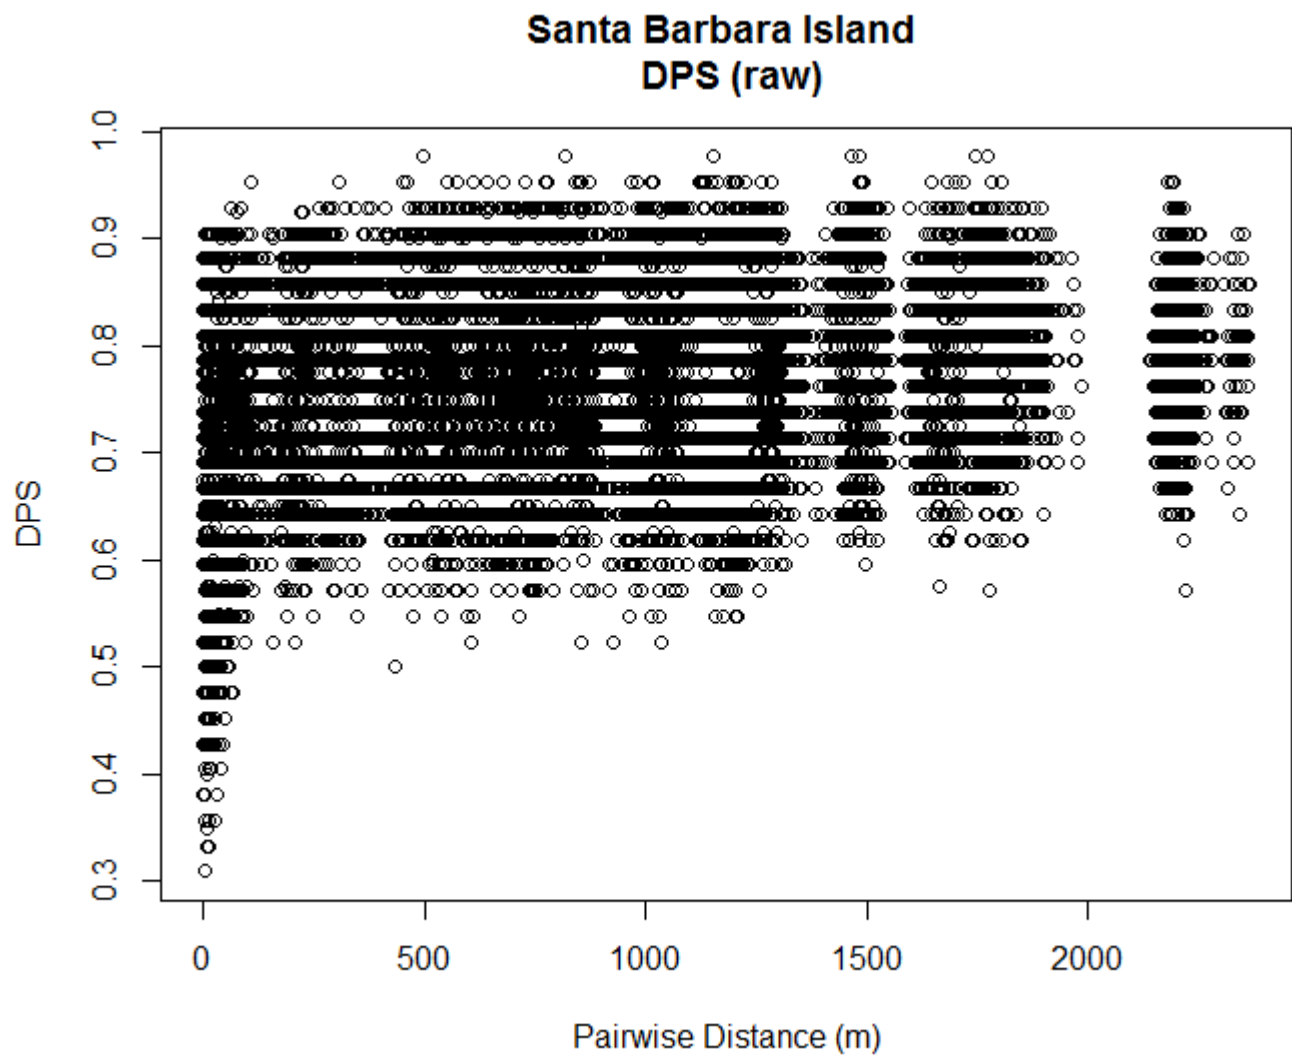



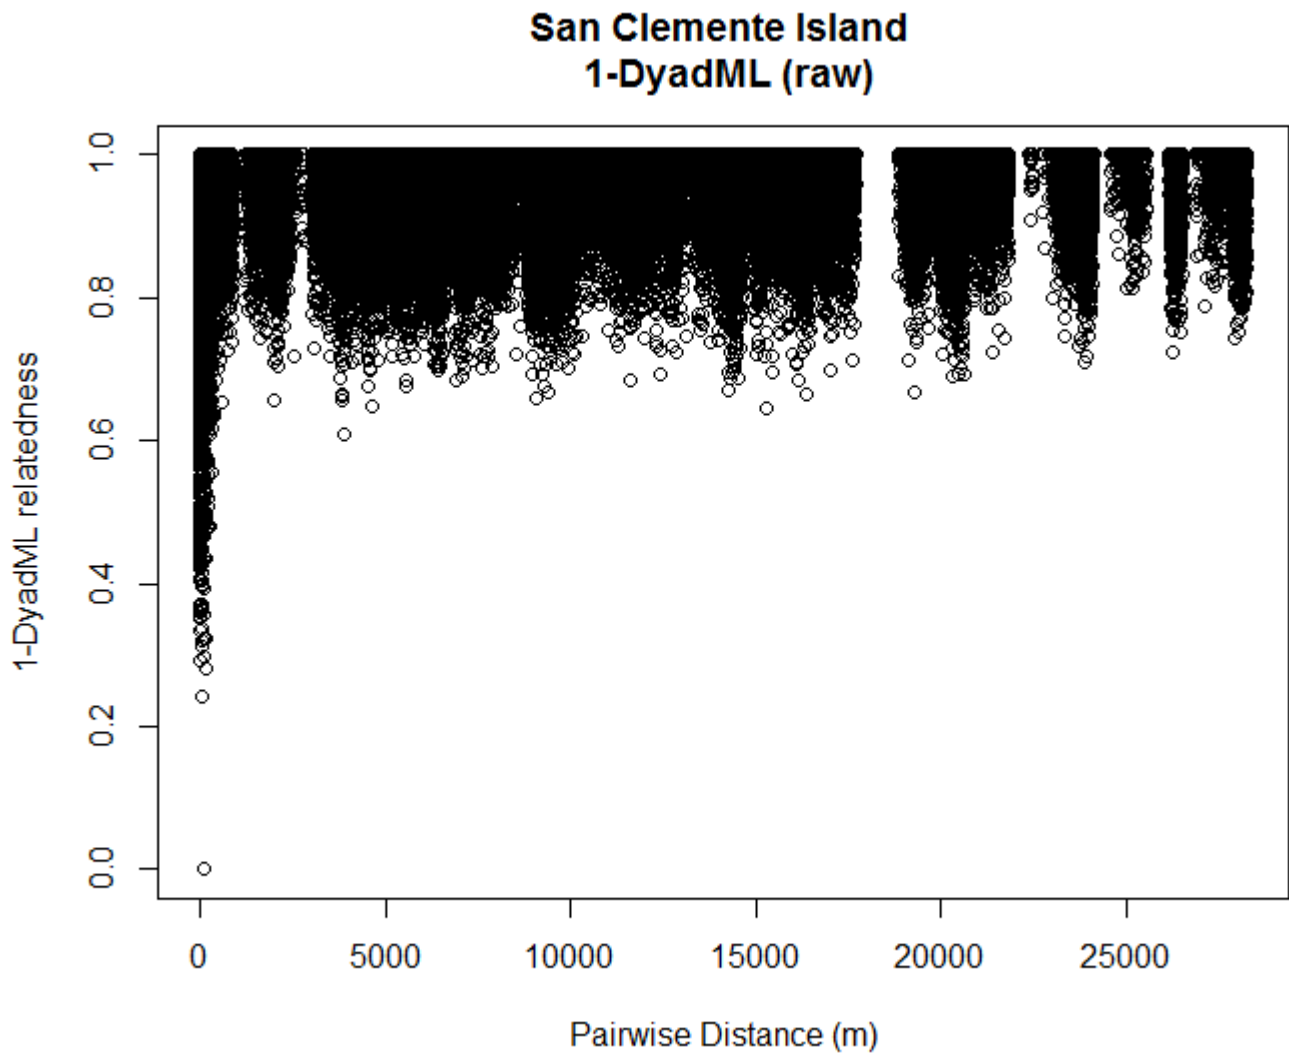

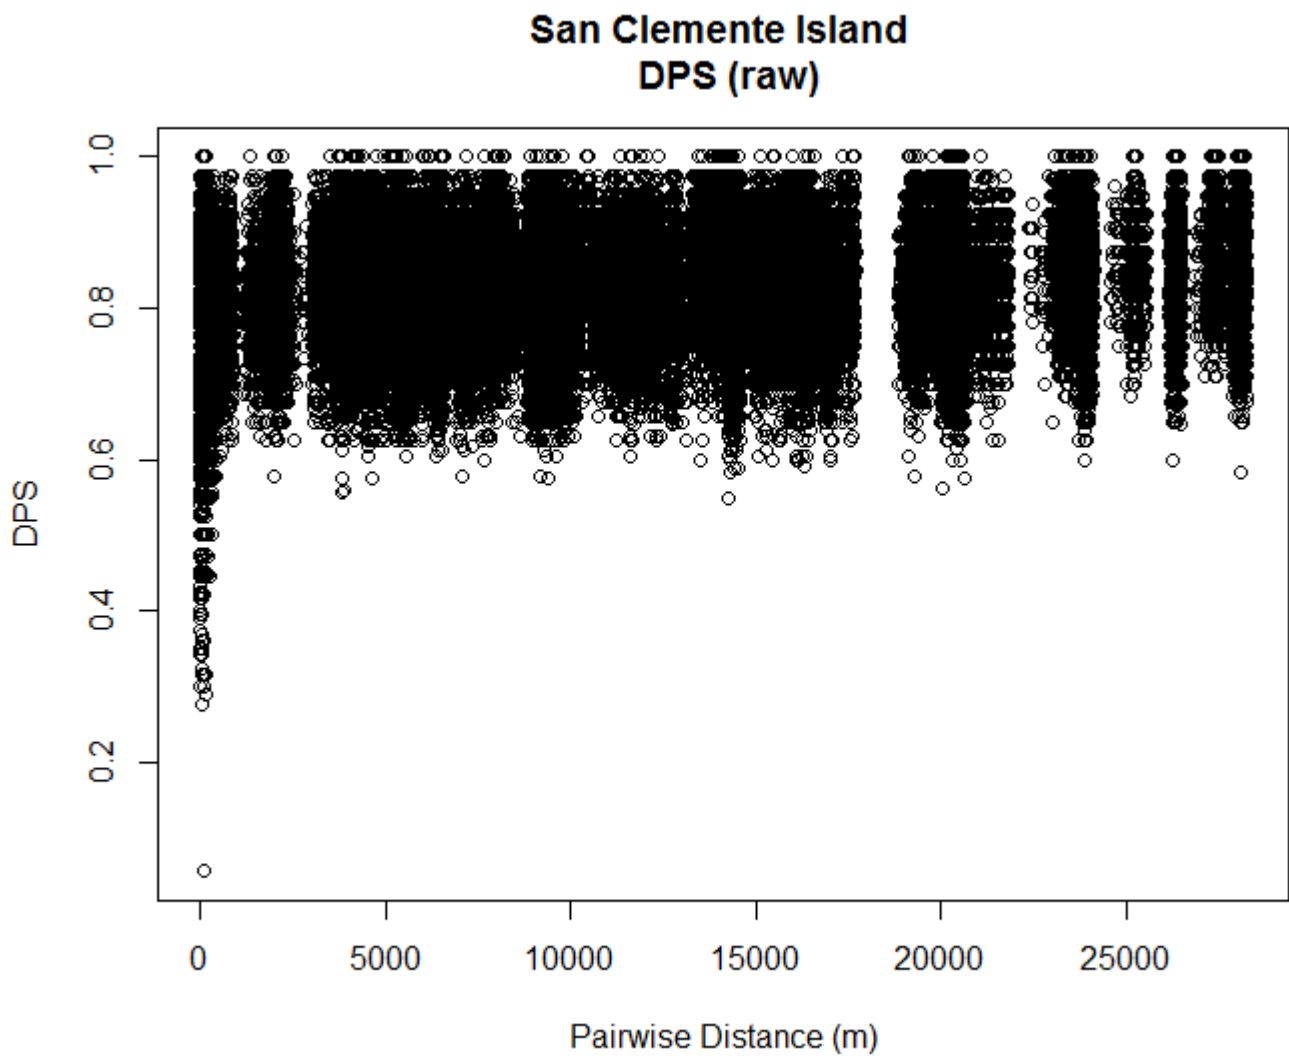

Source: http://biorxiv.org/content/10.1101/125666v1.full.pdf
